# Supplementary material
Source: PubMed Central journal article supplement (PMC8424478)
Supplement: jamapediatr-e211497-s001.pdf [file jamapediatr-e211497-s001.pdf]

---

## ***CLINICAL INVESTIGATIONAL PLAN***

---

### ***A NEW MEDICAL DEVICE FOR NEONATAL RESPIRATORY SUPPORT DURING RESUSCITATION***

### ***A RANDOMISED CONTROLLED TRIAL OF DELIVERY ROOM INTUBATION RATES COMPARING A NEW SYSTEM AND T-PIECE RESUSCITATION SYSTEM FOR INITIAL STABILISATION OF INFANTS BORN <28 WEEKS***

---

|                                |                                                                                                                                                                                                                                           |
|--------------------------------|-------------------------------------------------------------------------------------------------------------------------------------------------------------------------------------------------------------------------------------------|
| Protocol short Name:           | CORSAD: Comparison Of Respiratory Support After Delivery on infants born before 28 weeks gestational age                                                                                                                                  |
| Protocol version & status      | 1.0 EPN, 25 May 2015<br>1.1 Updated 7 June 2016<br>1.2 Updated 5 October 2017<br>1.3 Updated 22 November 2017<br>1.4 Updated 5 December 2017<br>1.5 Updated 28 February 2018<br>1.6 Updated 12 December 2018<br><br>Details in section 26 |
| Investigational Medical Device | Inspiration Health Care resuscitation system (CE-marked)                                                                                                                                                                                  |

|                                                          |                                                                                                                                                                                                 |
|----------------------------------------------------------|-------------------------------------------------------------------------------------------------------------------------------------------------------------------------------------------------|
| Sponsor                                                  | Baldvin Jonsson, MD, PhD, Karolinska University Hospital, Astrid Lindgrens Childrens Hospital, Neonatal Unit                                                                                    |
| Coordinating Investigator                                | Baldvin Jonsson, MD, PhD, Coordinating Investigator, Karolinska Institutet and Karolinska University Hospital, Astrid Lindgrens Childrens Hospital, Neonatal Unit                               |
| Principal Investigator at Karolinska University Hospital | Marco Bartocci, MD, Principal Investigator, Karolinska University Hospital, Astrid Lindgrens Childrens Hospital, Neonatal Unit.                                                                 |
| CIP revision History                                     | 1.0 EPN reviewed and approved by EPN Stockholm<br>Updated 1.1-1.6 (section 26)                                                                                                                  |
| Clinical Development phase                               | Product will be CE-marked before trial starts. The trial is not intended for regulatory purposes or company funded.                                                                             |
| Study Management                                         | Thomas Drevhammar, MD, PhD student, Karolinska Institutet. Study Coordinator<br><br>Lars Söderström, Biostatistician, Data management and statistics (retired 2018, replacement to be decided). |
| Started                                                  | 3 March 2016                                                                                                                                                                                    |
| Planned completion                                       | Q4 2019                                                                                                                                                                                         |

## 3 Table of Contents

|    |           |                                                                                   |           |
|----|-----------|-----------------------------------------------------------------------------------|-----------|
| 4  | <b>1</b>  | <b>PROTOCOL SUMMARY (SYNOPSIS)</b> .....                                          | <b>6</b>  |
| 5  | <b>2</b>  | <b>ABBREVIATIONS</b> .....                                                        | <b>11</b> |
| 6  | <b>3</b>  | <b>PRINCIPAL INVESTIGATOR-(S) ENDORSEMENT PAGE</b> .....                          | <b>13</b> |
| 7  | <b>4</b>  | <b>ADMINISTRATIVE INFORMATION</b> .....                                           | <b>14</b> |
| 8  | <b>5</b>  | <b>BACKGROUND INFORMATION</b> .....                                               | <b>18</b> |
| 9  | <b>6</b>  | <b>INVESTIGATIONAL DEVICE</b> .....                                               | <b>20</b> |
| 10 | 6.1       | THE REFERENCE DEVICE – THE T-PIECE RESUSCITATION SYSTEM .....                     | 20        |
| 11 | 6.2       | THE INVESTIGATIONAL MEDICAL DEVICE - THE NEW SYSTEM.....                          | 20        |
| 12 | <b>7</b>  | <b>OBJECTIVES</b> .....                                                           | <b>22</b> |
| 13 | 7.1       | PRIMARY OBJECTIVE (EFFICACY) .....                                                | 22        |
| 14 | 7.2       | SECONDARY OBJECTIVES.....                                                         | 22        |
| 15 | <b>8</b>  | <b>ENDPOINTS</b> .....                                                            | <b>23</b> |
| 16 | 8.1       | PRIMARY ENDPOINTS .....                                                           | 23        |
| 17 | 8.2       | SECONDARY ENDPOINTS .....                                                         | 23        |
| 18 | <b>9</b>  | <b>TRIAL DESIGN</b> .....                                                         | <b>24</b> |
| 19 | 9.1       | OUTLINE.....                                                                      | 24        |
| 20 | 9.2       | ASSESSMENT OF EFFICACY AND SAFETY .....                                           | 25        |
| 21 | 9.3       | INVESTIGATIONAL MEDICAL DEVICE – TRAINING OF STAFF AT PARTICIPATING CENTRES ..... | 27        |
| 22 | <b>10</b> | <b>RISK TO BENEFIT RATIONAL OF THE DEVICE AND CLINICAL ASPECTS</b> .....          | <b>28</b> |
| 23 | <b>11</b> | <b>SELECTION AND WITHDRAWAL OF SUBJECTS</b> .....                                 | <b>30</b> |
| 24 | 11.1      | INCLUSION CRITERIA.....                                                           | 30        |
| 25 | 11.2      | EXCLUSION CRITERIA .....                                                          | 30        |
| 26 | 11.3      | CRITERIA AND PROCEDURES FOR DEALING WITH ‘WITHDRAWAL’ .....                       | 31        |
| 27 | 11.4      | SUBJECT STUDY PARTICIPATION AND REPLACEMENT OF SUBJECTS .....                     | 32        |
| 28 | 11.5      | SUBJECT SCREENING LOG AND SUBJECT IDENTIFICATION .....                            | 32        |
| 29 | <b>12</b> | <b>DEVICE CE-MARKING</b> .....                                                    | <b>33</b> |
| 30 | 12.1      | DEVICE DISTRIBUTION .....                                                         | 33        |
| 31 | <b>13</b> | <b>CONCOMITANT DEVICE PROHIBITIONS AND STUDY COMPLIANCE</b> .....                 | <b>33</b> |
| 32 | <b>14</b> | <b>ASSESSMENT OF EFFICACY AND SAFETY</b> .....                                    | <b>34</b> |

Date: 12 December 2019

Version: 1.6

|    |           |                                                                                        |           |
|----|-----------|----------------------------------------------------------------------------------------|-----------|
| 33 | 14.1      | CLINICAL EFFICACY ASSESSMENTS.....                                                     | 34        |
| 34 | 14.2      | CLINICAL SAFETY ASSESSMENTS.....                                                       | 34        |
| 35 | 14.3      | LABORATORY EFFICACY AND SAFETY ASSESSMENTS.....                                        | 35        |
| 36 | <b>15</b> | <b>PROCEEDINGS FOR ADVERSE EVENTS.....</b>                                             | <b>36</b> |
| 37 | 15.1      | SCHEMATIC DECISION TREE FOR CLASSIFICATION ADVERSE EVENTS.....                         | 36        |
| 38 | 15.3      | DEFINITIONS OF DIFFERENT TYPES OF ADVERSE EVENTS AND DEVICE DEFICIENCIES.....          | 37        |
| 39 | 15.4      | ASSESSMENT OF ADVERSE EVENTS.....                                                      | 40        |
| 40 | 15.5      | METHODS FOR ELICITING ADVERSE EVENTS.....                                              | 41        |
| 41 | 15.6      | REPORTING AND RECORDING DIFFERENT TYPES OF ADVERSE EVENTS AND DEVICE DEFICIENCIES..... | 41        |
| 42 | <b>16</b> | <b>STATISTICS AND DATA MANAGEMENT.....</b>                                             | <b>45</b> |
| 43 | 16.1      | DATA MANAGEMENT AND CASE REPORT FORMS.....                                             | 45        |
| 44 | 16.2      | STATISTICAL ANALYSIS.....                                                              | 46        |
| 45 | 16.3      | DETERMINATION OF SAMPLE SIZE.....                                                      | 46        |
| 46 | <b>17</b> | <b>DIRECT ACCESS TO SOURCE DOCUMENTS.....</b>                                          | <b>47</b> |
| 47 | <b>18</b> | <b>QUALITY CONTROL AND QUALITY ASSURANCE.....</b>                                      | <b>48</b> |
| 48 | 18.1      | SOURCE DATA.....                                                                       | 48        |
| 49 | 18.2      | MONITORING.....                                                                        | 48        |
| 50 | <b>19</b> | <b>ETHICS.....</b>                                                                     | <b>50</b> |
| 51 | 19.1      | INDEPENDENT ETHICS COMMITTEE.....                                                      | 50        |
| 52 | 19.2      | ETHICAL CONDUCT OF THE TRIAL.....                                                      | 50        |
| 53 | 19.3      | SUBJECT INFORMATION AND INFORMED CONSENT.....                                          | 50        |
| 54 | <b>20</b> | <b>DATA HANDLING AND RECORD KEEPING.....</b>                                           | <b>50</b> |
| 55 | 20.1      | RECORD KEEPING.....                                                                    | 50        |
| 56 | <b>21</b> | <b>FINANCING AND INSURANCE.....</b>                                                    | <b>51</b> |
| 57 | <b>22</b> | <b>PUBLICATION POLICY AND REGISTRATION.....</b>                                        | <b>52</b> |
| 58 | <b>23</b> | <b>SUPPLEMENTS.....</b>                                                                | <b>52</b> |
| 59 | 23.1      | AMENDMENTS.....                                                                        | 52        |
| 60 | 23.2      | PERSONNEL INFORMATION.....                                                             | 52        |
| 61 | <b>24</b> | <b>REFERENCES.....</b>                                                                 | <b>52</b> |
| 62 | <b>25</b> | <b>APPENDICES.....</b>                                                                 | <b>54</b> |
| 63 | 25.1      | SCHEDULE OF INVESTIGATIONAL EVENTS.....                                                | 54        |

---

|    |           |                                      |           |
|----|-----------|--------------------------------------|-----------|
| 64 | <b>26</b> | <b>VERSIONS AND AMENDMENTS</b> ..... | <b>55</b> |
|----|-----------|--------------------------------------|-----------|

65

66

67 **1 Protocol Summary (Synopsis)**

68

|                                                        |                                                                                                                                                                                                                                                                                                                                                                                                                                                                                                                                                                                                                                                                                                                                                         |
|--------------------------------------------------------|---------------------------------------------------------------------------------------------------------------------------------------------------------------------------------------------------------------------------------------------------------------------------------------------------------------------------------------------------------------------------------------------------------------------------------------------------------------------------------------------------------------------------------------------------------------------------------------------------------------------------------------------------------------------------------------------------------------------------------------------------------|
| Study Title                                            | Randomised Controlled Trial of a New Respiratory Resuscitation System                                                                                                                                                                                                                                                                                                                                                                                                                                                                                                                                                                                                                                                                                   |
| Study Clinical Development Phase                       | Product will be CE-marked before the study starts.<br>(The trial is not intended for regulatory purposes and is not company funded)                                                                                                                                                                                                                                                                                                                                                                                                                                                                                                                                                                                                                     |
| ID of Investigational Medical Device (IMD)             | Inspiration Healthcare resuscitation system (rPAP, CE-marked)                                                                                                                                                                                                                                                                                                                                                                                                                                                                                                                                                                                                                                                                                           |
| Classification of Investigational Medical Device (IMD) | IIb                                                                                                                                                                                                                                                                                                                                                                                                                                                                                                                                                                                                                                                                                                                                                     |
| ID of Reference Device                                 | T-piece resuscitation systems (CE-marked, several options)                                                                                                                                                                                                                                                                                                                                                                                                                                                                                                                                                                                                                                                                                              |
| Trial Objectives and Outcomes                          | <p>The primary objective is to compare the frequency of delivery room intubation rates for initial respiratory resuscitation between</p> <ul style="list-style-type: none"> <li>- new system (low imposed work of breathing and prongs) and</li> <li>- standard treatment with T-piece resuscitator system (high imposed work of breathing and face mask).</li> </ul> <p>The primary outcome is delivery room intubation or death.</p> <p>The secondary outcomes include time to intubation, use of surfactant, use of positive pressure ventilation, respiratory support at 72 hours and temperature on intensive care admission. Safety variables include pneumothorax, intraventricular haemorrhage and problems with ventilation and equipment.</p> |
| Subject population                                     | <p>250 Infants will be randomised.</p> <p><u>Inclusion criteria are:</u></p> <ol style="list-style-type: none"> <li>1) &lt;28 weeks gestational age at university hospitals.</li> <li>2) Delivery can be vaginal or with caesarean section and steroid prophylaxis to mother can be complete, incomplete or not given.</li> </ol>                                                                                                                                                                                                                                                                                                                                                                                                                       |

|                                                                         |                                                                                                                                                                                                                                                                                                                                                                                                                                                                                                                                                                                                                                                                                                                                                                                                                                                                                                                                                                                                                                                                                                                  |
|-------------------------------------------------------------------------|------------------------------------------------------------------------------------------------------------------------------------------------------------------------------------------------------------------------------------------------------------------------------------------------------------------------------------------------------------------------------------------------------------------------------------------------------------------------------------------------------------------------------------------------------------------------------------------------------------------------------------------------------------------------------------------------------------------------------------------------------------------------------------------------------------------------------------------------------------------------------------------------------------------------------------------------------------------------------------------------------------------------------------------------------------------------------------------------------------------|
|                                                                         | <p><u>Exclusion criteria are:</u></p> <ol style="list-style-type: none"> <li>1) Decision on treatment limitations before randomisation,</li> <li>2) Decision to intubate infant made before delivery (for example local routine for infants born before 23 weeks GA).</li> <li>3) Known airway, pulmonary, cardiac, gastro-intestinal tract malformations,</li> <li>4) Known neuromuscular disease</li> <li>5) No study neonatologist available</li> </ol>                                                                                                                                                                                                                                                                                                                                                                                                                                                                                                                                                                                                                                                       |
| <p>Trial Design (include: number of visits, duration and follow-up)</p> | <p>Two arm randomised comparison of two systems ( T-piece device and the new system ) for respiratory support after delivery of an infant &lt;28 weeks GA. The interventions cannot be blinded. Randomisation will be stratified on centre, gestational age and antenatal steroid treatment. This multicentre trial will start at Karolinska Hospital and other sites can join throughout the study period.</p> <p>Screening for eligibility and consent will be performed on mothers with threatening delivery of an extremely premature infant.</p> <p>The intervention is respiratory support for the first 10-30 minutes of life and will begin after birth when the infant is transferred to the resuscitation team.</p> <p>The intervention ends 1) when an infant is intubated (primary outcome), 2) after a minimum of 10 minutes support, with the randomized system, the patient is stable and breathing adequately, 3) at 30 minutes when the respiratory support can continue as decided by the clinicians (cross-over not allowed).</p> <p>After 72 hours the patient records will be reviewed.</p> |
| <p>Assessment</p>                                                       | <p>Apart from the system used for respiratory support all patients will receive standard care. No</p>                                                                                                                                                                                                                                                                                                                                                                                                                                                                                                                                                                                                                                                                                                                                                                                                                                                                                                                                                                                                            |

|                                      |                                                                                                                                                                                                                                                                                                                                                                                                                                                                                                                                                                                                                                                                                                                                                                                                                                                                                                                                                                                                                                                                                                                                                                                |
|--------------------------------------|--------------------------------------------------------------------------------------------------------------------------------------------------------------------------------------------------------------------------------------------------------------------------------------------------------------------------------------------------------------------------------------------------------------------------------------------------------------------------------------------------------------------------------------------------------------------------------------------------------------------------------------------------------------------------------------------------------------------------------------------------------------------------------------------------------------------------------------------------------------------------------------------------------------------------------------------------------------------------------------------------------------------------------------------------------------------------------------------------------------------------------------------------------------------------------|
|                                      | <p>assessments or investigations of the trial subjects are planned. Data will be reported by the resuscitation team and collected from records.</p>                                                                                                                                                                                                                                                                                                                                                                                                                                                                                                                                                                                                                                                                                                                                                                                                                                                                                                                                                                                                                            |
| Statistical methods and calculations | <p>All analysis will be on intention to treat and <math>p &lt; 0.05</math> considered statistically significant.</p> <p>The primary outcome variable (delivery room intubation or death) will represent a 2x2 cross table and analysed with Pearson chi-square test.</p> <p>The secondary outcomes include Kaplan Meier analysis of time to intubation and comparisons of means for continuous variables.</p>                                                                                                                                                                                                                                                                                                                                                                                                                                                                                                                                                                                                                                                                                                                                                                  |
| Risk and benefits of IMD             | <p>The new device (IMD) has been designed for neonatal resuscitation and CE-marked for this intended use.</p> <p>The device is operated/handled in a similar way to existing devices and can provide support according to resuscitation guidelines.</p> <p><u>Benefits:</u> During spontaneous breathing the CPAP provided with the new system is more pressure stable and has low imposed work of breathing. The benefits of decreased imposed work of breathing during resuscitation have not previously been investigated. The new system has the option of using prongs as the patient interface. Prongs have shown promising results in trials and have theoretical benefits. We hypothesis that the combined use of prongs and low imposed work of breathing could reduce the number of infants that need mechanical ventilation.</p> <p><u>Risks:</u> There are no known or foreseen medical risks with the device related to the low imposed work of breathing and the use of prongs (short duration).</p> <p>There is an increased risk when using a new device related to user error and malfunctioning. To reduce this risk, the IMD is CE marked and developed</p> |



|                                       |                                                                                                                                                                                                                                                                                                                                                                                                                                                                                                                                                                                                         |
|---------------------------------------|---------------------------------------------------------------------------------------------------------------------------------------------------------------------------------------------------------------------------------------------------------------------------------------------------------------------------------------------------------------------------------------------------------------------------------------------------------------------------------------------------------------------------------------------------------------------------------------------------------|
|                                       | <p>according to the European Medical Device Directive and its Essential Requirements. This means e.g. reducing the risks by fulfilling the requirements of the Risk Management standard (ISO 14971 Medical devices -- Application of risk management to medical devices) and the standard for Quality Management (ISO 13485 Medical devices -- Quality management systems -- Requirements for regulatory purposes)</p> <p>The risk will be further reduced by training and using experienced investigators. If there are problems with the IMD there are always backup systems ready for use.</p>       |
| Independent Data Monitoring Committee | <p>The independent DMC report to the sponsor/coordinating investigator and consist of a senior neonatologist (chairman) and two more clinicians. They will ensure the safety of the participants, the overall quality and the integrity of the trial by periodic reviews (details in appendix).</p> <p>The DMC will compare blinded data for the two intervention groups. Safety variables, primary outcome, protocol adherence, rescue treatment and the quality of the data will be examined. Stopping criteria (benefit, harm and futility) will be on the primary outcome and safety variables.</p> |
| Schedules of events                   | <ol style="list-style-type: none"> <li>1) Continuous screening of mothers with threatening extremely premature infant delivery</li> <li>2) Antenatal visit including informed consent and inclusion</li> <li>3) Randomisation when delivery is imminent</li> <li>4) Intervention and delivery room report</li> <li>5) Clinical notes follow up after 72 hours</li> </ol>                                                                                                                                                                                                                                |
| First Subject In                      | March 2016                                                                                                                                                                                                                                                                                                                                                                                                                                                                                                                                                                                              |

|                  |         |
|------------------|---------|
| Last subject In  | Q4 2019 |
| Last subject out | Q4 2019 |

69

70

71 **2 Abbreviations**

72

| Abbreviation   | Explanation                                                                           |
|----------------|---------------------------------------------------------------------------------------|
| AE             | Adverse Event                                                                         |
| ADE            | Adverse Device Event                                                                  |
| APGAR          | Scoring system for infants after delivery                                             |
| ASADE          | Anticipated serious adverse device events (are specified in risk analysis report)     |
| CE             | Conformité Européene                                                                  |
| CPAP           | Continuous Positive Pressure Ventilation                                              |
| DMC            | Data Monitoring Committee                                                             |
| DR             | Delivery Room                                                                         |
| eCRF           | Electronic Case Report Form                                                           |
| GA             | Gestational Age                                                                       |
| IB             | Investigator's Brochure                                                               |
| IEC            | Independent Ethics Committee                                                          |
| ILCOR          | International Liaison Committee on Resuscitation                                      |
| IMD            | Investigational Medical Device                                                        |
| ISO            | International Organization for Standardization                                        |
| ISO 14155:2011 | Clinical Investigation of Medical Devices for human subjects – Good Clinical Practice |
| ISO 15223-1    | ISO for labelling device                                                              |
| IVH            | Intra Ventricular Haemorrhage                                                         |
| iWOB           | Imposed Work of Breathing                                                             |
| MEDDEV         | Commission Guideline relating to medical devices directives (European)                |
| MPA            | Medicinal Product Agency                                                              |
| NCAR           | National Competent Authority Report                                                   |
| NCPAP          | Nasal Continuous Positive Airway Pressure                                             |
| NICU           | Neonatal Intensive Care Unit                                                          |
| PPV            | Positive Pressure Ventilation                                                         |
| RDS            | Respiratory Distress Syndrome                                                         |

|       |                                            |
|-------|--------------------------------------------|
| SAE   | Serious Adverse Event                      |
| SNQ   | Swedish Neonatal Quality Register          |
| SpO2  | Peripheral capillary oxygen saturation     |
| UE    | User error                                 |
| UID   | Unique Identifier                          |
| USADE | Unanticipated serious adverse device event |

73

74 **3 Principal Investigator endorsement page**

75 I, the undersigned, am responsible for the conduct of the following title study: CORSAD, Clinical  
76 Investigational Plan (CIP version at footer) and agree to the following:

- 77 ✓ I understand and will conduct the clinical trial according to the CIP, any approved  
78 amendment to CIP, the ISO-14155:2011, the Declaration of Helsinki and all applicable  
79 national laws.
- 80 ✓ I will not deviate from the CIP without prior written permission from the Sponsor and prior  
81 review and written approval from the IEC, except where necessary to prevent any  
82 immediate danger to patients.

**Principal Investigators signature**

**Date**

\_\_\_\_\_

\_\_\_\_\_

PI name, signaute and site

83

## 84 4 Administrative Information

85

86 *Sponsor and Coordinating Investigator*

87 *Baldvin Jonsson, MD, PhD, Associate Professor and senior consultant in neonatology*

88 *Karolinska Univerity Hospital*

89 *Departement of Neonatology*

90 *Norrbacka S3:03*

91 *S-171 76 Stockholm*

92 *Sweden*

93 *Email: [baldvin.jonsson@ki.se](mailto:baldvin.jonsson@ki.se)*

94 *+46-851775130 (direct)*

95 *+46-8-51770000 (switchboard)*

96 *+46-8-51773053 (fax)*

97

98 *Study Coordinator* *Snorri Donaldsson, MD*

99 *Management* *Karolinska Univerity Hospital*

100 *Departement of Neonatology*

101 *Norrbacka S3:03*

102 *S-171 76 Stockholm*

103 *Sweden*

104 *Email: [snorri.donaldsson@ki.se](mailto:snorri.donaldsson@ki.se)*

105 *+46-700924156 (mobile)*

106 *+46-851776707 (direct)*

107 *+46-8-51770000 (switchboard)*

108

109

110 *Study Coordinator* *Thomas Drevhammar, MD, PhD*

111 *Administration* *Dep. Anaesthesiology and Intensive Care*

112 *Östersund Hospital*

113 *83183 Östersund*

114 *Email: [thomas.drevhammar@regionjh.se](mailto:thomas.drevhammar@regionjh.se)*

115 *+46-63-153000 (switchboard)*

116 *+46-701712361 (mobile)*

117

118

119

120 *Principal Investigator - Karolinska University Hospital Solna*

121 *Marco Bartocci, MD, PhD*

122 *Karolinska Univerity Hospital*  
123 *Departement of Neonatology*  
124 *Norrbacka S3:03*  
125 *S-171 76 Stockholm*  
126 *Sweden*  
127 *Email: Marco.Bartocci@ki.se*  
128 *+46-851772785 (direct)*  
129 *+46-8-51770000 (switchboard)*

130  
131 *Principal Investigator - Stavanger University Hospital*  
132 *Siren Rettedal, MD, PhD*  
133 *Department of Pediatrics*  
134 *Stavanger University Hospital*  
135 *Armauer Hansens vei 20*  
136 *Stavanger*  
137 *4011 Norway*  
138 *Email: siren.irene.rettedal@sus.no*  
139 *+47-51518052 (switchboard)*  
140 *+47-51518465 (direct)*

141  
142  
143 *Principal Investigator - Linköping University Hospital*  
144 *Fredrik Lundberg*  
145 *Department of Pediatrics*  
146 *Linköping University Hospital*  
147 *581 85 Linköping*  
148 *Email: Fredrik.Lundberg@regionostergotland.se*  
149 *+46-72-513 50 85*

150  
151 *Principal Investigator – Vilnius University Hospital*  
152 *Ingrida Pilypienė, MD, PhD*  
153 *Vilnius University Hospital Santaros Klinikos*  
154 *Obstetrics and Gynecology Center, Neonatal Unit*  
155 *LT-08406 Vilnius*  
156 *Lithuania*  
157 *Email: ingrida.pilypiene@santa.lt*  
158 *+37067299489*  
159  
160

161 *Principal Investigator - Poznan University Hospital*  
162 *Tomasz Szczapa, MD PhD*  
163 *Department of Neonatology, Poznan University of Medical Sciences*  
164 *Poznan 60-535*  
165 *Poland*  
166 *Email: tszczapa@gmail.com*  
167 *+48618419270 (office)*  
168 *+48607576457 (mobile)*  
169  
170 *Principal Investigator - University Hospital of Iceland*  
171 *Thordur Thorkelsson, MD*  
172 *Department of neonatology*  
173 *University Hospital of Iceland*  
174 *101 Reykjavík*  
175 *Iceland*  
176 *Email: thordth@landspitali.is*  
177 *+3548255094 (mobile)*  
178  
179 *Principal Investigator – Sahlgrenska University Hospital, Gothenburg*  
180 *Yinghua LI, MD, PhD*  
181 *Department of neonatology*  
182 *Sahlgrenska University Hospital, Gothenburg*  
183 *416 50 Gothenburg*  
184 *Email: [yinghua.li@vgregion.se](mailto:yinghua.li@vgregion.se)*  
185 *+46724538511(mobile)*  
186  
187 *Biostatistician* *Lars Söderström, Biostatistician (retired 2018 to be replaced)*  
188 *Unit of Research, Education and Development*  
189 *Östersund Hospital*  
190 *Box 654*  
191 *831 27 Östersund*  
192 *Email: lars.soderstrom@regionjh.se*  
193 *+46-722259086 (mobile)*  
194  
195 *GCP consult* *Helena Fenger-Krog (retired 2018 but available if needed)*  
196 *Karolinska Trial Alliance, KTA Support*  
197 *Norra Stationsgatan 67*  
198 *Karolinska University Hospital Solna*  
199 *171 76 Stockholm*



200 *Email: Helena.fenger-krog@karolinska.se*

201 *+46-8-58584019*

202 *Data Monitoring Committee Members*

203 *Stellan Håkansson, Associate Professor, Senior Consultant Neonatology*

204 *University Hospital of Umeå*

205

206 *Mikael Norman, Professor in Pediatrics, Senior Consultant Neonatology*

207 *Karolinska Institutet, Stockholm*

208

209

## 210 **5 Background Information**

211

### 212 *Plain language summary*

213 After birth the infant needs to start breathing, expand the lung and clear the airway of fluids. The  
214 extremely preterm infant has immature lungs and the transition to breathing is often difficult. The initial  
215 respiration after birth can be absent, inadequate or gradually failing. Several respiratory support  
216 treatments are used to aid this transition.

217 The infants who do not breathe need to be ventilated with positive pressure. The infants that breathe on  
218 their own receive a continuous positive airway pressure (CPAP) that supports the opening of the  
219 previously closed lungs. Infants that cannot establish a stable spontaneous breathing have to be  
220 intubated and ventilated with a mechanical ventilator.

221 Intubating and ventilating an infant is associated with higher morbidity compared to the infants that can  
222 breathe on their own with CPAP support. A key objective with resuscitation and stabilization is therefore  
223 to increase the number of infants that can be treated without intubation and mechanical ventilation.  
224 This approach has contributed to increased survival with less respiratory sequelae among extremely  
225 premature infants. There are several trials that have investigated treatments aimed at further reducing  
226 the need for intubation and mechanical ventilation. The presented trial is in line with this tradition.

227

### 228 *Introduction*

229 The initial management of premature infants have been evolving towards less invasive management.<sup>1</sup>  
230 The benefit of non-invasive management was first noted in observational studies and then in a  
231 randomized trial, the COIN trial.<sup>2</sup> Less invasive care has been further studied in trials such as the VON,  
232 CURPAP and SUPPORT trials.<sup>3</sup> The European guidelines for the treatment of RDS recommend using  
233 NCPAP in combination with surfactant and trying to avoid intubation and mechanical ventilation.<sup>4</sup>

234 In the preterm infant population the most important factor for needing invasive ventilation is gestational  
235 age and for the smallest infants mechanical ventilation is the most common support. The intubation rate  
236 for patients born in Sweden before 28 weeks of gestational age was 60% during 2012 and 2013 (data  
237 from Swedish Neonatal Quality register (SNQ)).

238 The international guidelines on resuscitation (ILCOR) give several options for respiratory support after

239 delivery.<sup>5</sup> The algorithm aims at establishing stable spontaneous breathing and includes positive  
240 pressure ventilation (PPV) if the infant is not breathing and the option to use continuous positive airway  
241 pressure (CPAP) to facilitate breathing or ventilation. The guideline also allows use of nasal prongs  
242 instead of a face mask as the patient interface. The effect of different CPAP systems, the CPAP level and  
243 the effect of using different patient interfaces have been insufficiently studied.<sup>6</sup>

#### 244 *Effect of CPAP*

245 The provision of CPAP during resuscitation has been suggested to be beneficial and is used in several  
246 clinical trials.<sup>5</sup> However, when supporting a breathing infant with CPAP, the infant will be challenged  
247 with the additional workload that is needed to breathe through the support system (imposed work of  
248 breathing). The imposed work of breathing (iWOB) has been suggested to be an important factor for  
249 treatment failure and subsequent need for intubation. In our previous ex-vivo study the standard system  
250 for resuscitation (T-piece) has been shown to have high iWOB.<sup>7</sup> A method for providing ventilator  
251 support with CPAP and with lower iWOB might reduce treatment failure and subsequent need for  
252 intubation.

#### 253 *Effect of Patient Interface*

254 There has been one trial comparing nasal prongs and face mask that showed better results for the nasal  
255 prong interface.<sup>8</sup> Still the standard care has remained using a face mask. There are no more published  
256 trials using bi-nasal prongs but an observational study with historical controls including 124 patients was  
257 presented at the PAS meeting in Vancouver 2014.<sup>9</sup> The delivery room intubation rates were 23/67 for  
258 face mask and 11/57 for bi-nasal prongs ( $p=0.061$ ) for infants with an gestational age of 26+4 and 27+0  
259 weeks. They had no safety problems.

#### 260 *Clinical experience with new system*

261 A clinical feasibility trial was started in 2012 at Karolinska University Hospital for delivery room support  
262 of infants 27-34 weeks gestational age. The trial had three treatment arms (T-piece resuscitation system,  
263 the new system with face mask and the new system with prongs) and randomisation was balanced to 12  
264 patients in each arm. The main outcome was usability and the trial did not have power to detect  
265 differences in intubation rates or variables related to stabilisation of breathing. The trial was performed  
266 under the regulatory framework of non-CE marked, own produced equipment (National Board of Health  
267 and Welfare).

268 The trial finished April 2015 with 36 patients recruited. The new system has worked well and there have  
269 been no technical problems. The results will be submitted as an abstract to a scientific meeting (jENS,

Date: 12 December 2019

270 16-20 September 2015, Budapest)

271 *Research question*

272 For infants born <28 weeks of age, can initial respiratory resuscitation with new system (low imposed  
273 work of breathing and prongs) reduce the frequency of delivery room intubations compared to standard  
274 treatment with T-piece resuscitator system (high imposed work of breathing and face mask)?

## 275 **6 Investigational Device**

### 276 **6.1 The Reference Device – the T-piece Resuscitation System**

277 The T-piece resuscitator system can be used for PPV as well as CPAP. The T-piece is provided with a  
278 constant fresh gas flow. PPV is provided by occlusion of the patient device and adjusted with a pressure  
279 limiting valve at the driver. CPAP is generated by outflow obstruction (an adjustable resistor) at the  
280 patient device. The T-piece resuscitation system can be connected to a facemask or an endotracheal  
281 tube.

282

### 283 **6.2 The Investigational Medical Device - the new system**

284 The investigational medical device (the new system) is handled in a similar way to the T-piece  
285 resuscitator system. The IMD is provided with a fresh gas flow equivalent to the T-piece resuscitator  
286 system. PPV is provided by occlusion of the patient device and adjusted with a pressure limiting valve at  
287 the driver. It has the same PPV performance as a T-piece resuscitator system in terms of peak pressure  
288 and inspiratory rise time. CPAP is generated in the patient by turbulent flow opposing expiration and  
289 aiding inspiration (technology from the Infant Flow generator). The level of CPAP is adjusted at a bedside  
290 driver and not at the patient device (different compared to T-piece resuscitator systems). The IMD has  
291 an imposed work of breathing measured ex-vivo at the same level as the most pressure stable variable  
292 flow NCPAP generators and significantly lower compared to T-piece resuscitator systems. The IMD can  
293 be used with prongs or a standard connector to a facemask or an endotracheal tube. Switching between  
294 prongs and facemask requires changing a connector at the patient interface side of the device. The  
295 design of the prongs has been used for more than twenty years

296 The IMD was developed in Östersund and at the Karolinska University Hospital. The invention has been  
297 licence for production and commercialization to a UK company that is certified for production of medical

---

298 devices (ISO 13485). The product will be CE marked and the letter of conformity will be appended to the  
299 CIP.

300

## 301 **7 Objectives**

### 302 **7.1 Primary Objective (Efficacy)**

303

304 The primary objective is to compare delivery room intubation rates for two types of respiratory  
305 resuscitation systems in extremely premature infants.

306

307 The new system has low imposed work of breathing and in this trial, use prongs as the recommended  
308 patient interface. The use of prongs and the low imposed work of breathing are expected to improve  
309 respiratory support and increase the number of infants that can achieve stable spontaneous breathing.

### 310 **7.2 Secondary Objectives**

311

312 The secondary objective is to compare the safety between the treatments. This includes (but are not  
313 limited to) death, intra ventricular haemorrhage, pneumothorax, airleaks, need to change system  
314 used for respiratory support, failed ventilation and problems with use or devices.

315

316 The other secondary objective is to compare the two treatments and the effects of initial respiratory  
317 support other than delivery room intubation rates. This includes the time of intubation after  
318 delivery, the time needed for initial stabilisation, the use of surfactant, the use of PPV, respiratory  
319 support at 72 hours of age and temperature on admission to the intensive care unit.

320

321 The study will also include hypothesis generating and explanatory variables including background  
322 information on mother and infant, reason for intubation, summary of other events and use of  
323 surfactant.

324

325

## 326 **8 Endpoints**

327

### 328 **8.1 Primary Endpoints**

329

330 The primary outcome is delivery room intubation or death.

331 Death has to be included in the primary outcome since patients that die may not always be intubated.

### 332 **8.2 Secondary Endpoints**

333

334 The safety endpoints are:

- 335 1. Death
- 336 2. Intra ventricular haemorrhage grade III or more
- 337 3. Airleaks and pneumothorax
- 338 4. Failed ventilation
- 339 5. Device problems or malfunction

340

341 The secondary endpoints are:

- 342 1. Time to primary outcome (intubation or death) up to 72 hours of age
- 343 2. Surfactant use in DR and NICU (<72 h). Method to deliver surfactant, time to treatment and  
344 repeated dosage. Three modes of surfactant delivery will be recorded: After intubation,  
345 intratracheal installation on NCPAP failure with or without short episode of mechanical  
346 ventilation (for example MIST and INSURE) and nebulized.
- 347 3. The use of PPV in delivery room
- 348 4. Use of sustained inflation (not recommended)
- 349 5. Reason for DR intubation
- 350 6. APGAR at 1, 5 and 10 minutes
- 351 7. Time to stable breathing
- 352 8. Oxygen level, SpO2 and level of CPAP support at 5 and 10 minutes
- 353 9. Patient temperature on NICU admission
- 354 10. Reason for NICU intubation
- 355 11. Mechanical ventilation at any time <72 h
- 356 12. Mechanical ventilation or mode of non-invasive support at 72 h
- 357 13. Decisions on treatment limitations during resuscitation
- 358 14. Withdrawal or withholding treatment

359 Date: 12 December 2019

## 360 9 Trial Design

### 361 9.1 Outline

362 The study is a two arm randomised comparison of two systems for respiratory support after  
363 delivery. The comparison is between the use of a T-piece resuscitation device (standard  
364 intervention) and the new system (new intervention). The interventions cannot be blinded.

#### 365 *Justification of the trial design*

366 A randomised controlled trial is the golden standard of investigating the possible benefits of a  
367 resuscitation system with low imposed work of breathing and resuscitation by prongs.

#### 368 *Justification of patient population*

369 Gestational age is the most important predictor for respiratory failure and subsequent need for  
370 intubation. The range of gestational age for the study population has been selected at a balanced  
371 intubation rate. Intubation rate goes from 37% at 27 weeks to 94% at 23 weeks for national  
372 Swedish data (2012-2013). This may vary between centres and at the Karolinska University  
373 Hospital in 2013, no infants at 27 weeks (0/8) were intubated and all infants 23 weeks (9/9). The  
374 GA where half of the infants were intubated can be found at 25-26 weeks for both Swedish national  
375 and Karolinska University Hospital data.

376 Infants >28 weeks GA have not been included since they have a very low incidence of intubation and  
377 would be less likely to show an effect on the primary outcome variable.

378 A lower limit gestational age is difficult to set and instead infants with a decision to intubate prior to  
379 delivery should be excluded. This exclusion criteria aims to avoid conflicts with local routines to  
380 intubate the smallest infants. Even if a very high proportion of the smallest infants are intubated  
381 there are no foreseen risks of using the new technique compared to the T-piece technique before  
382 these patients are intubated. The hypothesised benefits of support using prongs and pressure stable  
383 CPAP also apply to this patient group even if all patients would be intubated.

384



## 385 9.2 Assessment of Efficacy and Safety

386  
387 The assessment of efficacy and safety will be based on data after delivery room management, as  
388 reported in eCRF by the attending resuscitation team. Data will also be collected after 72 hours from  
389 patient records. The collected variables are discussed in section 14 and listed in the Variable list  
390 appendix.

391 Safety will be assessed by secondary outcomes (section 14.2) and by reporting problems with  
392 equipment (errors, deficiency, malfunction) and adverse events (section 16.3). The  
393 sponsor/coordinating investigator will rely on the independent DMC to compare safety and efficacy  
394 between the two treatments during the trial.

395 A high incidence of safety variable events is expected in both groups. Respiratory and other medical  
396 complications will be common, irrespectively of the respiratory support systems used. Historical  
397 data from Sweden indicates that approximately 20% of the patients will not survive.

398

### 399 9.2.1 Schedule of Investigational Events

400

401 Please see section 27.1 for a table with the scheduled investigational Events.

402

403 The investigational events are:

- 404 1. Screening will be of all patients admitted with threatening preterm labour of an extremely  
405 premature infant.
- 406 2. An antenatal visit to the mother (and father when possible) including consent, inclusion and  
407 exclusion criteria. The antenatal visit by neonatologist is a routine part of standard care. The  
408 visit usually includes information of delivery room management (resuscitation, intubation  
409 and respiratory support systems) and intensive care. Informing about the trial will require  
410 additional time for the antenatal visit (typically below 30 minutes).
- 411 3. Randomisation will be on hold until delivery is imminent.
- 412 4. After delivery the infant will receive the intervention (randomised respiratory support  
413 system) for 10-30 minutes.
- 414 5. Data from patient records will be collected after 72 hours.

415

---

416 The collected variables are discussed in section 14 and listed in the Variable list appendix.

417

418

### 419 9.3 Investigational Medical Device – training of staff at participating centres

420  
421 Staff on the participating centres will be trained on the device, usage and the study protocol before  
422 start (site initiation). Adequate training will be documented for PI (documented GCP training  
423 required) and members of the site investigational team. An abbreviated CV of investigators with  
424 focus on neonatal training and resuscitation will also be included. This will be recorded in a log  
425 including names, initials, signature, function and authorization before access to eCRF and  
426 randomisation is given. New members can be added to this log and investigators that are not active  
427 shall be inactivated. This is the responsibility of the Principal Investigator at each site and will be  
428 checked by the monitor at site initiation. The coordinating investigator is responsible for providing  
429 support for teaching and training before start and as needed during the trial. Examples of training  
430 are on site visit with demonstrations, simulations and usage on patients not included in the trial.

431  
432 The need for training after starting the trial could be identified by the staff on the participating  
433 centre, by monitoring, by the independent DMC or by the coordinating investigator. Request for  
434 training is encourage and contact details to Baldvin Jonsson or Snorri Donaldsson can be found in  
435 section 4.

436  
437 *Training by usage outside the trial*

438 The System is CE marked and can be used outside the trial.

439  
440 *Run-in patients*

441 Participating centres have an option to include the first three patients as pilot patients. Data from  
442 these patients will be included in the data provided to the DMC and for the halfway interim analysis  
443 but they will not be included in the final analysis. The aim of using pilot patients is to reveal  
444 problems and allow centres to test the protocol before enrolling true patients.

445

## 446 **10 Risk to Benefit Rational of the Device and Clinical aspects**

447

448 The new device (IMD) has been designed for neonatal resuscitation and CE-marked for this  
449 intended use. The device is operated/handled in a similar way to existing devices and can provide  
450 support according to resuscitation guidelines.

451 Benefits: During spontaneous breathing the CPAP provided with the new system is more pressure  
452 stable and has low imposed work of breathing. The benefits of decreased imposed work of  
453 breathing during resuscitation have not previously been investigated. The new system has the  
454 option of using prongs as the patient interface. Prongs have shown promising results in trials and  
455 have theoretical benefits. We hypothesis that the combined use of prongs and low imposed work of  
456 breathing could reduce the number of infants that need mechanical ventilation.

457 Risks: There are no known or foreseen medical risks with the device related to the low imposed  
458 work of breathing and the use of prongs (short duration).

459 *Reducing the risks*

460 With any new device there is an increased risk related to user error and malfunctioning.

461 This risk has been reduced by using an IMD that is CE marked and developed according to the  
462 European Medical Device Directive and its Essential Requirements. This means e.g. reducing the  
463 risks by fulfilling the requirements to the Risk Management standard (ISO 14971 Medical devices --  
464 Application of risk management to medical devices) and the standard for Quality Management (ISO  
465 134 85 Medical devices - Quality management systems - Requirements for regulatory purposes)  
466

467 The trial will further reduce the risks by training and using experienced investigators. Using  
468 experienced investigators and personnel is important for recognising problems with equipment or  
469 usage.

470 *Limiting the consequences of unforeseen risks and problems*

471 If there are problems with the IMD there are always backup systems ready for use. Immediate  
472 access to backup systems is routine in areas used for resuscitation.

473 The participating centres have capacity for intensive care and are experienced in treatment of the  
474 known problems that can occur during resuscitation and respiratory support.

475 Adverse events, deficiencies, malfunctioning will be processed according to ISO 141 55 (Clinical  
476 Investigation of medical devices for human subjects - Good Clinical Practice). This will be reported  
477 by eCRF according to section 15. In case of uncertainty the sponsor/coordinating investigator can  
478 use the independent DMC for advice. Any problems will also be reported to the manufacturer  
479 according to the medical Device Vigilance System (see section 15), local authorities and ethical  
480 review board as appropriate.

481 If needed, stopping the trial by disabling randomisation is fast and no infants should be at risk of  
482 being treated if there are concerns with safety.

483 *Summary*

484 For the participating patients the risks are small compared to the possible benefits.

485  
486 Risks have been assessed and reduced by the manufacturer following regulations and standards of  
487 Medical Devices product development and manufacturing (please see above). The trial is designed  
488 to handle problems or concerns with safety efficiently and in a structured way according to Good  
489 Clinical Practice (ISO 141 55).

490

491

## 492 **11 Selection and Withdrawal of Subjects**

### 493 **11.1 Inclusion Criteria**

494

495 Approximately 250 infants will be randomised with an estimated enrolment period of three years  
496 time. The Inclusion criteria are:

- 497 • <28 weeks gestational age at university hospitals.
- 498 • Delivery can be either vaginal or with caesarean section and steroid prophylaxis to mother  
499 can be complete, incomplete or not given.

500

### 501 **11.2 Exclusion Criteria**

502 The exclusion criteria are:

- 503 • Decision on treatment limitations before randomisation
- 504 • Decision to intubate infant made before delivery (for example local routine for infants born  
505 before 23 weeks GA).
- 506 • Known airway, pulmonary, cardiac, gastro-intestinal tract malformations
- 507 • Known neuromuscular disease
- 508 • Fetal hydrops
- 509 • No study neonatologist available

510

511 **11.3 Criteria and procedures for dealing with ‘Withdrawal’**

512 *Withdrawal of consent:*

513 Withdrawal of consent before randomisation will be reported and the patient will receive standard  
514 treatment. Patient will not be asked if data can be collected.

515 Withdrawal of consent after randomisation but before delivery will be reported and the patient will  
516 receive standard treatment. The parent will be asked if data can be collected as intended. They  
517 should be offered an explanation of intent to treat analysis.

518 Withdrawal of consent during treatment will be reported and the patient will receive standard  
519 treatment. This is likely to be rare since the intervention period is very short (less than 30 minutes).  
520 The parents will be asked if data collected up to the point can be used and data can be collected as  
521 intended. They should be offered an explanation of intent to treat analysis.

522 If a parent withdraws consent to treatment but is still consenting to data collection, the consent will  
523 be adjusted by adding “withdraws consent to treatment but consents to collecting data”, dated and  
524 signed by investigator and parent.

525 If the withdrawal is related to safety or performance as well as adverse events or suspected adverse  
526 events this will be reported to the DMC even if no further collection of data is allowed.

527 *Stopping the trial temporarily (suspension) by disabling randomisation*

528 If the trial has to be stopped temporarily (ISO 14155:2011 section 7.1.1 suspension), for example by  
529 order from authorities, manufacturer, sponsor or DMC, the randomisation process will be disabled  
530 and subjects will receive standard care. Since randomization is performed just before delivery and  
531 the intervention is short <30 minutes stopping the trial is fast and there is no process for  
532 withdrawing patients that has been randomized. If the trial is stopped the planned data collection  
533 from records will continue as planned. There are no planned investigations or events that needs to  
534 be discontinued.

535 *Responsibility to stop the intervention for individual patients*

536 The safety of the patient is the responsibility of the resuscitation team. Failure to provide adequate  
537 ventilation or respiratory support is a secondary outcome and expected for both treatments. If the  
538 intervention cannot provide adequate ventilation there are several options including adjustment of  
539 support (CPAP and PPV level), intubation or the use of backup systems. Crossover between the  
540 treatments is regarded as a protocol violation. Details are provided in the clinical management  
541 appendix.

Date: 12 December 2019

Version: 1.6

542 The clinical management protocol provides details for how to handle equipment problems. This  
543 includes the use of back-up equipment. Back-up equipment is always available during resuscitation  
544 of infants and not specific for the patients included in the trial. The use of back-up equipment and  
545 failed ventilation is a secondary outcome.

546 There will be a number of infants where the clinician withdrawing or withholding treatment  
547 because of poor prognosis. This is also a secondary outcome.

#### 548 **11.4 Subject Study Participation and Replacement of Subjects**

549

550 The antenatal visit will include the mother's participation and will require additional time for trial  
551 information and enrolment.

552 Each subject will receive the intervention for 10-30 minutes after birth. There are no investigations  
553 or other activities that require subject participation after this.

554 No replacements of subjects have been discussed. The independent DMC has an option to increase  
555 sample size based on over all event rates.

#### 556 **11.5 Subject Screening Log and Subject Identification**

557

558 All patients screened will be registered in the eCRF with screening date, initials, date of birth and if  
559 the patient is suitable. If considered not suitable the reason for this will be recorded. No further  
560 information will be collected if patients are unsuitable. Patients suitable will be approached for  
561 consent.

562

563 For patients that do not consent to participation, no further information will be collected or  
564 registered. Patients that consent to participation will be enrolled with full name and personal  
565 identifier (social security number or personal identification number as applicable) and go through  
566 inclusion and exclusion criteria.

567

568 The eCRF allow the trial monitor to identify patients on a site to access source data in patient  
569 records. The PI at each site can identify patients on their site since this may be needed for Adverse  
570 Event reporting or queries raised by the monitor. The investigators at each site can search enrolled  
571 patients when proceeding to randomisation or when entering data in the eCRF forms.

572



## 573 **12 Device CE-marking**

574  
575 The device will be CE-marked according Medical Device Directive 93/42/EEC, Class IIb by  
576 Inspiration Healthcare, UK. The intended purpose will include respiratory support during neonatal  
577 resuscitation. The CE-marking includes:

- 578 • Packaging, labelling and handling
- 579 • Traceability
- 580 • Biocompatibility
- 581 • Risk-evaluation

### 582 **12.1 Device Distribution**

583  
584 The device is CE-marked and will be delivered to sites either through the manufacture retailer  
585 network or by the sponsor's department. The logistics of distribution will depend on national  
586 regulations and will be in place before a site starts to enrol patients.

## 587 **13 Concomitant Device prohibitions and Study Compliance**

588  
589 No other respiratory support than the randomised system is allowed (protocol violation). Cross-  
590 over between the two treatments are not allowed (protocol violation). Use of bag and mask systems  
591 as rescue is allowed if needed and this represent a secondary outcome. Use of rescue systems will  
592 be reported to the DMC as a variable that may be linked to equipment or ventilation problems.

593 Compliance to randomised systems is expected to be high and non-adherence to protocol will be  
594 reported to the DMC as a variable that may be linked to equipment or ventilation problems.

595 Study personnel reporting in eCRF form will be automatically monitored by alerts (e-mail  
596 reminders) after randomisation. Delays in reporting (time limits for completion) will also generate  
597 alerts by e-mail.

598 **14 Assessment of Efficacy and Safety**

599 **14.1 Clinical Efficacy Assessments**

600

601 The primary efficacy variable is intubation in delivery room or death. The decision to intubate is  
602 made by the investigator responsible for resuscitating the infant.

603 Other efficacy variables from the delivery room are: 1) time to intubation 2) variables related to  
604 effective ventilation such as time to spontaneous breathing, need for PPV, APGAR, need for  
605 surfactant and SpO<sub>2</sub>.

606 The *immediate delivery report form* is reported by the investigator responsible for resuscitating the  
607 infant.

608 Follow-up at three days includes status on admission to NICU, any NICU intubation <72 hours or  
609 administration of surfactant.

610 The *delayed delivery report form and the three days follow up* are reported by study personnel at the  
611 site.

612 **14.2 Clinical Safety Assessments**

613

614 The expected safety variables that will be analysed by the DMC are:

- 615 1) Death
- 616 2) Intubation
- 617 3) Pneumothorax, airleaks and drainage
- 618 4) IVH and lung bleed

619 There are also more than ten variables (not counting APGAR and rare events such as chest  
620 compressions) that reflect problems or effectiveness of ventilation. These variables, or a selection,  
621 will be reviewed by the DMC (to be decided at the first DMC meeting).

622 There are four main variables that reflect problems with equipment and potential problems with  
623 trial design or the interventions (Management completed with randomised system; Problems with  
624 adhering to protocol; Any problems with equipment and Any adverse events).

625 The safety variables of the *immediate delivery report form* is reported by the investigator  
626 responsible for resuscitating the infant.

627 The *delayed delivery report form* and *the three days follow up* are reported by the study personnel at  
628 the site.

629 *Registering an AE or problems with equipment will be handled according to Section 15: Proceedings*  
630 *for Adverse Events.*

### 631 **14.3 Laboratory Efficacy and Safety Assessments**

632

633 There are no planned laboratory investigations.

634

635 **15 Proceedings for Adverse Events**

636

637 **15.1 Schematic Decision Tree for Classification Adverse Events**

638

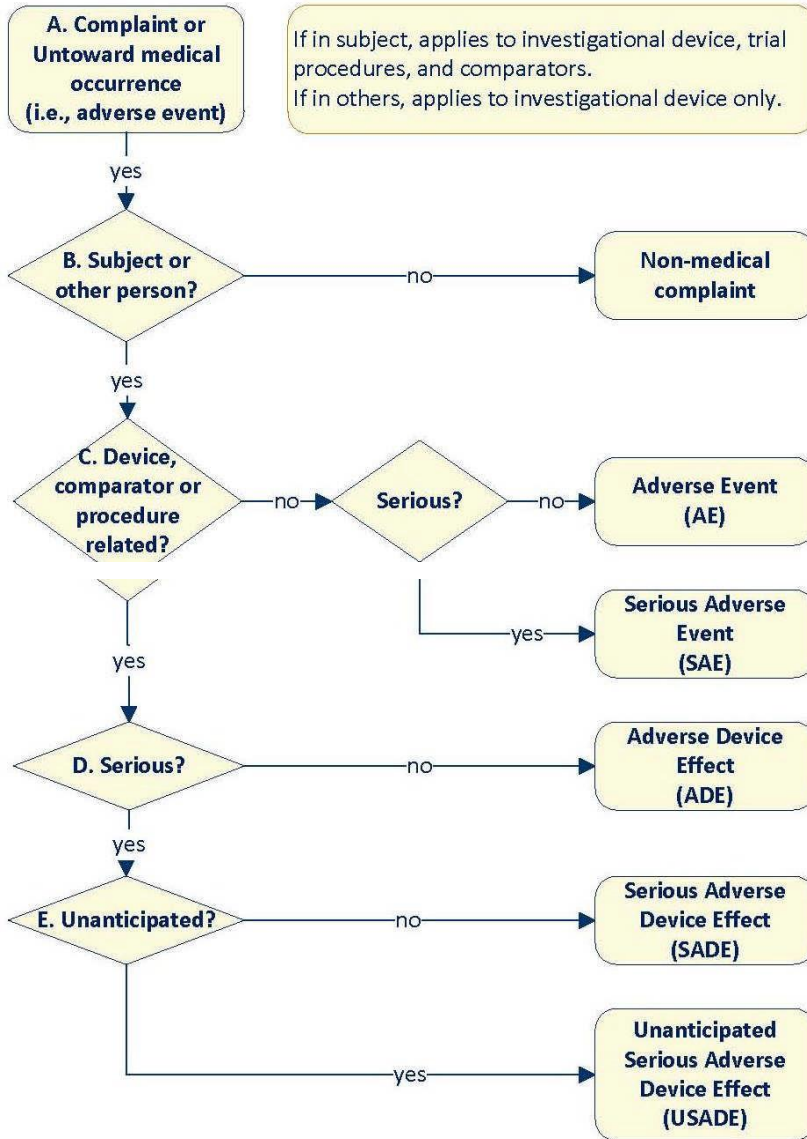

639

640

641

## 642 15.3 Definitions of different types of Adverse Events and Device Deficiencies

### 643 15.3.1 Adverse Events (AE)

644 An Adverse Event (AE) is any untoward medical occurrence, unintended (or unfavourable) disease or injury  
645 or untoward clinical signs (including abnormal laboratory findings) in subjects, users or other persons,  
646 whether or not related to the investigational medical device or comparator.

647 NOTE 1: This definition includes events related to the *procedure* involved

648 NOTE 2: For users or other persons, this definition is restricted to events related to investigational medical  
649 devices.

### 650 15.3.2 Adverse Device Effect (ADE)

651 If AE is related to the use of investigational device (or comparator) and related to investigational device or  
652 comparators *procedures or functions or intended use* it is considered as an adverse device effect (ADE).

653 NOTE 1: This definition includes adverse events resulting from insufficient or inadequate instructions for use,  
654 deployment, implantation, installation, or operation or any malfunction of investigational device.

655

656 NOTE 2: This definition includes any event resulting from error use or from intentional misuse of the  
657 investigational medical device.

### 658 15.3.3 Serious Adverse Events (SAE)

659 Each AE is to be classified by the investigator as 'serious' or 'non-serious'. Seriousness is not defined by a  
660 medical term; it is a result or an outcome. An AE is defined as a Serious Adverse Event (SAE) if it:

661 a) led to death,

662 b) led to a serious deterioration in the health of the subject, that either resulted in

663 ✓ a life-threatening illness or injury, or

664 ✓ a permanent impairment of a body structure or body function, or

665 ✓ in-patient or prolonged hospitalization (of existing hospitalisation), or

666 ✓ medical or surgical intervention to prevent life threatening illness or injury or permanent  
667 impairment to a body structure or a body function,

668 ✓ led to foetal distress or congenital abnormality or birth defect

669 *Please note! Planned hospitalizations for a pre-existing condition, or a procedure required by the CIP without*  
670 *deterioration, are not considered a serious adverse event.*

### 671 15.3.4 Serious Adverse Device Effect (SADE)

672 An adverse device effect that has resulted in any of the consequences characteristic of a *serious adverse*  
673 *event* (see above)

674 **15.3.5 Unanticipated Serious Adverse Device Effect (USADE)**  
675 An unanticipated Serious Adverse Device Effect which by its nature, is an incidence, severity or outcome that  
676 has ***not been identified in the current version of the risk analysis report.***

677

678 **15.3.6 Device Deficiency (DD)**

679 All device deficiencies related to the identity, quality, durability, reliability, safety or performance of  
680 investigational medical (or comparator) device shall be documented throughout the clinical investigation and  
681 appropriately managed by sponsor.

682 Device deficiency is an inadequacy of a medical device with respect to its identity, quality, durability,  
683 reliability, safety or performance

684 NOTE: Device deficiency include malfunctions, use errors and inadequate labelling

685 Please note! Device deficiencies that did not lead to an adverse event but **could have led to medical**  
686 **occurrence**

687 a) If either suitable action had not been taken

688 b) If intervention had not been made or

689 c) If circumstances had been less fortunate

690 shall be reported to sponsor. Sponsor is then responsible for the classification (as stated in §8.2.5 b) *to review*  
691 and determine *and document in writing* whether they could have led to a serious device effect.

692 **15.3.7 Device Malfunction (DM)**

693 Malfunction is the failure of the investigational medical **device to perform in accordance with its intended**  
694 **purpose** when it is used in accordance with the instructions for use or as intended in CIP (and does not  
695 involve a subject or any other persons (e.g. care giver, by standard) and is not lead to a medical occurrence, is  
696 considered as a 'malfunction' of device.

697 Please note! Do not confound with 'USE ERROR'

698 **15.3.8 Use Error (UE)**

699 Use error is the act or omission of an act that results in a different medical device response than intended by  
700 the manufacturer or expected by the user.

701 NOTE 1: Use error includes slips, lapses and mistakes.

702 NOTE 2: An unexpected physiological response of the subject does not in itself constitute a use error

703

704 **15.4 Assessment of Adverse Events**

705  
706 According to ISO14155:2011 the Sponsor is responsible for the classification of adverse events and ongoing  
707 safety evaluation during the clinical investigation and shall review the investigators assessment of all adverse  
708 events and determine and document in writing their seriousness and relationship to investigational device; in  
709 case of disagreement between sponsor and the principal investigator the sponsor shall communicate both  
710 opinions to concerned parties.

711 Assessment of Intensity

712 Each AE is to be classified by the investigator as mild, moderate or severe.

713 **Mild:** Acceptable. The subject is awareness of symptoms or signs, but they are easy tolerated.

714 **Moderate:** Disturbing. The AE is discomfort enough to interfere with usual daily activity.

715 **Severe:** Unacceptable. The subject is incapacity to work or to do usual daily activities.

716 Assessment of Causality

717 **Unlikely:** The event is most likely related to aetiology other than the Investigational medical Device

718 **Possible:** A causal relationship is conceivable and cannot be dismissed.

719 **Probably:** Good reason and sufficient documentation to assume a causal relationship.

720



## 721 15.5 Methods for Eliciting Adverse Events

722  
723 The investigational medical device and reference device are used during a short period directly after delivery  
724 and then transferred to intensive care. The patients are not expected to leave intensive care and will be under  
725 constant care. Any adverse event should be reported, documented and study personnel alerted. There will  
726 also be a review of records after 72 hours.

727 The study subjects (extremely premature infants) have a high incident of events that could be classified as  
728 adverse events and might be related to the type of randomised respiratory support system. The anticipated  
729 adverse events that are listed 15.6.3 constitute primary and secondary outcomes. These will be evaluated by  
730 the independent DMC at regular intervals. This includes (but are not limited to) death, intubation,  
731 pneumothorax, airleaks, inadequate breathing

732 Adverse events that are unanticipated (i.e. not reported in eCRF and under DMC review) always need to be  
733 reported and evaluated, even if the intensity was mild. Unanticipated Serious Adverse Device Effect (15.3.5) is  
734 of particular concern and should be reported and thoroughly investigated.

735 Any adverse events noted in the eCRF will result in e-mail alert to the Sponsor/coordinating investigator  
736 including the UID. The sponsor/coordinating investigator can review the AE and take appropriate actions  
737 (15.6).

738

## 739 15.6 Reporting and recording different types of Adverse Events and Device 740 Deficiencies

### 741 15.6.1 Reporting according to the Medical Device Vigilance System

742 Since the Investigational Device is CE marked, the Manufacturer is responsible for reporting any  
743 adverse incident according to the Vigilance system (MEDDEV 2 12-1 rev. 8 Vigilance). The trial is  
744 academic and the Sponsor is separate from the Manufacturer. Information on adverse incidents will  
745 therefore be reported to the manufacturer.

746  
747 The purpose of the Medical Device Vigilance System is to improve the protection of health and  
748 safety by reducing the likelihood of reoccurrence of incidents related to the use of a medical device.  
749 Therefore, The Medical Devices Directives provide that adverse incidents are evaluated and, where  
750 appropriate, information is disseminated in the form of a National Competent Authority Report  
751 (NCAR) with the objective of preventing repetition of such incidents through the adoption of  
752 appropriate field safety corrective actions.

753 Upon becoming aware that an event has occurred and that one of its devices may have caused or  
754 contributed to that event, the MEDICAL DEVICE MANUFACTURER must determine whether it is an  
755 INCIDENT. The following time lines apply in a case of:

- 756
- 757 • **Serious public health threat:** IMMEDIATELY (without any delay that could not be justified) but not  
758 later than 2 calendar days after awareness by the MANUFACTURER of this threat.
  - 759
  - 760 • **Death or UNANTICIPATED serious deterioration in state of health:** IMMEDIATELY (without any  
761 delay that could not be justified) after the MANUFACTURER established a link between the device  
762 and the event but not later than 10 elapsed calendar days following the date of awareness of the  
763 event.
  - 764
  - 765 • **Others:** IMMEDIATELY (without any delay that could not be justified) after the MANUFACTURER  
766 established a link between the device and the event but not later than 30 elapsed calendar days  
767 following the date of awareness of the event.
  - 768

## 769 **15.6.2 Reporting according to Good Clinical Practice**

770

771 This study will also document Adverse Events according to GCP (ISO 141 55 Clinical Investigation of  
772 Medical Devices for Human Subjects – Good Clinical Practice). Documentation will be the basis for  
773 reporting according to the Medical Device Vigilance System when applicable.

774

775 The Medical Device Vigilance System has time limit requirements on the Manufacturer and the  
776 Investigators reports to the Manufacturer should be handled without delays.

777

778 Throughout the clinical investigation all Adverse Events will be documented on a separate report  
779 form in the eCRF (Adverse Event Form). The Sponsor / coordinating investigator will administer  
780 this report, additional documentation or investigations. Apart from the initial eCRF documentation  
781 all subsequent documentation will be on paper and filed at Karolinska University Hospital.

782

783 The Sponsor/Coordinating Investigator is responsible for the classification of Adverse Events, and  
784 ongoing safety evaluation of the clinical investigation, and shall:

- 785 • Review the Investigators assessment of all Adverse Events.
- 786 • Review device deficiencies and determine whether they could have led to a SADE.
- 787 • Report, or ensure reporting, all SAEs and device deficiencies that could have led to a SADE,  
788 to the IEC by the Principal Investigator(s), if required.
- 789 • Report to the Regulatory Authorities (if required), within the required time period, all SAEs  
790 and device deficiencies that could have led to a SADE.

- 791       • Report all relevant safety information to the independent DMC according to written  
792       procedures.
- 793       • In case of a multicentre clinical investigation, inform all principal investigators in writing of  
794       all Serious Adverse Events at all investigation sites that have been reported and ensure that  
795       they are reported as required by local regulations.
- 796       • Decide if randomisation should be stopped during review and reporting

- 797
- 798   The principal Investigator at each site shall:
- 799       • Record every Adverse Event and observed Device Deficiency together with an assessment in  
800       the eCRF (Case Report Form for Adverse Events and Device Deficiencies).
- 801       • Report to the Sponsor/Coordinating Investigator all Serious Adverse Events and Device  
802       Deficiency that could have led to Serious Adverse Device Effect, without unjustified delay  
803       (within three calendar days).
- 804       • Report to IEC all Serious Adverse Events and Device Deficiency that could have led to  
805       Serious Adverse Device Effect, if required by local/national regulations.
- 806       • Report to Regulatory Authorities all Serious Adverse Events and Device Deficiency that  
807       could have led to Serious Adverse Device Effect, as required by national regulations.

808

809   Contact for support or discussion is encouraged. Contact the Coordinating Investigator, the  
810   Principal Investigator at Karolinska University Hospital or the Study Coordinator.

811

812   **15.6.2.1 Sponsor contact details:**

813

814   Baldvin Jonsson, MD, PhD, Karolinska University Hospital, Astrid Lindgrens Childrens Hospital,  
815   Neonatal Unit  
816   Email: baldvin.jonsson@ki.se  
817   +46-851775130 (direct)  
818   +46-8-51770000 (switchboard)  
819   +46-8-51773053 (fax)

820

821

822   If the coordinating investigator cannot be reached alternatives are; the Principal Investigator at  
823   Karolinska University Hospital (Snorri Donaldsson) or the Study Coordinator (Thomas  
824   Drevhammar). Contact details in section 4 (Administrative Information).

825

826 **15.6.3 List of Foreseeable Adverse Events and Anticipated Adverse Device Effects**  
827

828 The following events are foreseeable and anticipated. They are outcome variables and will be  
829 monitored. If the events are related to, or suspected to be related to, Device Deficiency (15.3.6),  
830 Device Malfunctioning (15.3.7) or User Error (15.3.8) they should be reported. If there are  
831 uncertainties the event should be reported.

832 List of events:

- 833 • Death
- 834 • Intubation
- 835 • Pneumothorax and airleaks
- 836 • IVH grade III or more
- 837 • Lungbleed.
- 838 • Problems with ventilation (variables reflecting use of rescue system, protocol violations and  
839 reason for intubation)

840

## 841 **16 Statistics and Data Management**

### 842 **16.1 Data Management and Case Report Forms**

843  
844 Electronic Case Report Forms (eCRF) will be completed for each included patient. A separate binder  
845 will be held for the signed Informed Consent. Investigators will ensure completion and review of the  
846 eCRF. Investigators have personal responsibility for the accuracy and authenticity of all data that  
847 are entered into the eCRF.

848  
849 The eCRF data will go through automatic check of range, format and inconsistencies when entered.  
850 After completion of the eCRF forms the file will be signed by the Principal Investigator at each site.  
851 To increase quality further a trial nurse or dedicated site investigator will be automatically notified  
852 if eCRF forms are not completed on time or if enrolled patients reach 28 weeks gestational age  
853 without being randomised. The notifications have no personal identifiers and will use UID. This  
854 continuous quality work does not replace monitoring and it has the aim of reducing loss of patients,  
855 encourage prompt reporting and increase quality.

856  
857 Software, security and backups of the eCRF are provided by MedSciNet. After completion of the last  
858 subject data in the eCRF will be exported without personal identifiers to a master file. The master  
859 file will be screened for completeness, inconsistencies and go through statistical analysis.

860  
861 During the course of the study the investigational team, and the monitor will have access to the  
862 study material (investigator binder with essential documents, Signed Informed Consent etc.). These  
863 will be kept in a locked place.

864

#### 865 **16.1.1 Entering of data into Case Report Forms**

866

867 Data will be entered in the eCRF. This will be source data for many of the variables concerning respiratory  
868 support during resuscitation. Most of the other data can also be found in patient records (background  
869 information on mother and patient, standard infant reports including APGAR, weight, drugs given and post  
870 resuscitation respiratory support). Instructions on use of eCRF and definitions will be available before trial  
871 start. A dry run version for instructional use will be available.

872 The eCRF application includes an automated user and an event logging system. Changes or corrections are  
873 logged.

874 After completion of the 72 hour follow up, the eCRF will be signed off by the Principle Investigator at each site.

Date: 12 December 2019

875

## 876 16.2 Statistical Analysis

877

878 The primary outcome will be evaluated as percent of events. The difference in events between the  
879 two arms will be tested according to Wald, using a p-value of 0.05.

880 Time to primary outcome will be described according to Kaplan-Meier and the difference between  
881 the two arms will be compared using the logrank test.

882 Descriptive measures of primary and secondary outcomes will be tabulated for each arm and  
883 differences between the arms will be assessed using Student's t-test or Fisher's exact test, where  
884 appropriate.

885 Relations between the primary event and confounding variables will be investigated using a logistic  
886 regression model, and tested according to Wald.

887 All analysis will be made according to intention to treat using a p-value of 0.05, adjusted according  
888 to Bonferroni for multiple comparisons.

889

## 890 16.3 Determination of Sample Size

891

892 Baseline event rate: The intubation rates for infants <28 weeks were 60% in Sweden 2012-13 (370  
893 of 615 patients). The delivery room death rate is difficult to estimate since deaths are unreliable  
894 (not always recorded) in SNQ.

895 Calculation: The calculations were performed with binary outcome superiority trial design at  
896 significance level (alpha) of 5% and power (1-beta) of 80%.

897 Estimated treatment effect: The effect that the new system may have on intubation rates or deaths  
898 is not known. A minimal important difference is probably an absolute reduction of around 10%,  
899 which corresponds to a number needed to treat (NNT) of 10. This would give a sample size of 770  
900 patients, which is not feasible.

901 The estimated sample size for two levels of treatment effect is 195 for an absolute reduction 20%  
902 (from 60% to 40% intubation rate). This corresponds to a number needed to treat (NNT) of 5.

903 Adjustments: The sample size has not been adjusted for patients lost (expected to be low) and  
904 differences in baseline intubation rates after application of exclusion criteria or when death is  
905 included in the primary outcome. The sample size has not been adjusted for clustering effect of  
906 multiples receiving the same treatment.

907

## 908 **17 Direct Access to Source Documents**

909

910 The monitor and authorities (if required) must be given direct access to source documents (original documents,  
911 data and records). Direct access includes permission to examine, analyse, verify and reproduce any record(s) and  
912 report(s) that are important to the evaluation of the clinical trial. The right to access data is included in the patient  
913 information and consent. The Principal Investigator at each site will ensure that site staff completes the eCRF and  
914 that the source documents are accessible. The monitor needs to sign secrecy agreement in accordance with  
915 national regulations and hospital practice before reviewing records.

916

917

## 918 **18 Quality Control and Quality Assurance**

### 919 **18.1 Source Data**

920

921 The investigator is responsible for maintaining the eCRF and include data on all patients who were screened,  
922 provided informed consent (or rejected), were enrolled, randomized and treated.

923 The investigators will record the patients screened, if they were suitable, reason if they were not suitable and  
924 if the patients that are approached for consent. This will be recorded in the first part of the eCRF and  
925 constitutes the screening log. It will contain no personal information (initials and date for screening).

926 The patients that give consent are enrolled with personal identifiers and receive a UID in the eCRF. The UID  
927 and personal identifiers constitutes the Patient Identification Log and is accessible by the principal  
928 investigator and monitor at each site.

929 Paper notes or copies of the log to facilitate logistics can be inserted in the trial binder.

930

931 The medical records of each patient included will include a note of participation in the study. The note will contain

- 932 • Study title (with a short description of the study)
- 933 • Information that an informed consent form has been signed and is kept with the study documentation
- 934 • Patient study number, UID
- 935 • Length of study (Intervention 10-30 minutes of age, follow-up after 72 hours, no planned investigations or  
936 procedures)
- 937 • Medically responsible study doctor and study nurse, with contact details

938

939 The medical record of each enrolled patient will include information on antenatal care, management during  
940 resuscitation and the intensive care period. After the initial stabilisation in the delivery room there are no planned  
941 procedures related to the trial and the patient will receive standard care. Any adverse events noted should be in  
942 records as well as withdrawal before study completion.

943

944 The Source Data List for the study will define where the source data for every efficacy and safety variable is to be  
945 found.

946

### 947 **18.2 Monitoring**

948



949 Before the beginning of the trial, the Sponsor will appoint an independent monitor. Monitoring will be performed  
950 before, during and after study completion in accordance with the ISO 141 55 standard.

951 Study conductance, source data, device accountability, adherence to the study protocol and Good Clinical Practice  
952 (ISO 141 55) plus regulatory requirements will be monitored.

953 A Monitoring Plan will be developed prior to the start of the study. This document will describes the  
954 frequency and the level of detailed of monitoring. It will include the degree of source data verification, based  
955 on the design and risk of the study.

956

### 957 **18.2.1 Query Process**

958

959 The monitor will review the e-CRFs and evaluate them for completeness and consistency. The e-CRF  
960 will be compared with the source documents to ensure that there are no discrepancies between  
961 critical data. All entries, corrections and alterations are to be made by the investigator or his/her  
962 designee. The monitor cannot enter data in the e-CRFs. Corrections to the eCRF will be audit trailed.  
963 This means that the reason for change, the name of the person who performed the change, together  
964 with time and date will be logged. Roles and rights of the site personnel responsible for entering the  
965 clinical data into the e-CRF will be determined in advance. If additional corrections are needed, the  
966 responsible monitor or data manager will raise a query in the electronic data capture application.  
967 The appropriate investigational personnel will answer queries in the e-CRF. This will be audit  
968 trailed by the electronic data capture application meaning that the name of investigational  
969 personnel, time, and date is logged.

970

971

972 **19 Ethics**

973 **19.1 Independent Ethics Committee**

974  
975 Local independent ethical committees will review the trial. National rules apply and it is the  
976 responsibility of the Principal Investigator at each site to adhere to these standards. IEC application  
977 and review will be included in the first monitor meeting before enrolment starts. The  
978 sponsor/coordinating investigator is responsible for reporting adverse events to the IEC as  
979 appropriate.

980 **19.2 Ethical Conduct of the Trial**

981  
982 The trial will be conducted according to Helsinki Declaration, Good Clinical Practice (ISO 14155),  
983 the national rules use of medical equipment and record keeping.

984 **19.3 Subject Information and Informed Consent**

985  
986 All subjects will be given verbal and written information about the study before signing the  
987 informed consent and being enrolled in the study. Consent is obtained from mother (and partner  
988 when applicable). The issue of legal guardian of an unborn child may vary between countries and  
989 the consent form can be adapted to this as necessary.

990 The information is written in such way that it is clear that a refusal of participation incurs no  
991 penalty for the subjects and this information is approved of the local Ethics Committee. The  
992 statement shall also confirm that the subject agrees that sponsor's representatives, regulatory  
993 authorities and IEC representatives will be granted direct access to subject medical record. The  
994 original consent will be filed and kept at each site.

995 **20 Data Handling and Record Keeping**

996  
997 **20.1 Record Keeping**

998  
999 To enable audits and evaluations by the sponsor and inspections by regulatory authorities, the  
1000 investigators shall keep records (essential documents) of the trial for a minimum of 10 years after

Date: 12 December 2019

1001 final signed clinical trial report. This includes any original source data related to the trial and the  
1002 original signed informed consent forms and e-CRF data. A copy of the eCRF database for the  
1003 patients enrolled at each site will be provided and compiled data from all sites will be stored at the  
1004 sponsor's/coordinating investigator's department.

1005 The sponsor/coordinating investigator should be contacted before any trial related documentation  
1006 is planned for destruction.

1007 Medical records containing personal information are filed in accordance with routines for hospital  
1008 patient records. This includes informed consent forms and documentation related to any adverse  
1009 events. Unique identifiers should be used as far as possible and personal information avoided. The  
1010 UID is generated by the eCRF when a patient has been enrolled. The UID key for patients enrolled at  
1011 a site is accessible by the Principal Investigator and monitor at that site. The UID key for all trial  
1012 subjects is accessible only by the Coordinating Investigator.

1013 The eCRF is developed by Medscinet in Microsoft SQL deploys a validated systems that complies  
1014 with Good Clinical Practice (GCP) predicate rule requirements, laws, and regulations for clinical trial  
1015 conduct and FDA 21 CFR 11 for electronic record and signature use. The applications are also  
1016 compatible with the rules of HIPPA, NIH and HL7 as well as the European (CENTC-251)  
1017 recommendations and requirements.

1018 The database application is protected by a username / password login with 128 bits encryption.  
1019 License for a Secure Server ID is included. The application includes an automated user and an event  
1020 logging system.

1021 Security and protection from fire, damage or human mistakes are by daily back-ups and weekly  
1022 back-ups with media stored in fireproof location. Back-ups are taken of both the database and the  
1023 application.

## 1024 **21 Financing and Insurance**

1025  
1026 The trial funding will be from several institutions, funds and research support organisations. A list  
1027 of applied and received grants is attached as a supplement. No company funding will be considered.

1028 The patient insurance (Patientförsäkringen, Stockholm County Council/ Stockholms Läns  
1029 Landsting) is valid for patients enrolled in Sweden.

1030 Centres recruiting patients in other countries need to provide information on insurance policies and  
1031 the requirements by the local Ethics Committee.

1032 The manufacturer has insurances for liability.

1033 The trial is academic with the coordinating investigator as the sponsor. The coordinating  
1034 investigator does not provide liability insurance valid for clinical trials.

## 1035 **22 Publication Policy and Registration**

1036  
1037 The results will be presented in an abstract to a scientific meeting and as a manuscript submitted to  
1038 a scientific journal. Authorship will be based on the principles of the Vancouver protocol and  
1039 participating centres are invited to contribute. Publication or analysis of data, or subsets of data,  
1040 from one site is not allowed before publication of results from the trial.

1041 The study will be included in Snorri Donaldson's PhD thesis at the Department of Women's and  
1042 Children's Health, Karolinska Institutet.

1043 The trial has been registered at [clinicaltrials.org](https://clinicaltrials.org) (NCT02563717).

## 1044 **23 Supplements**

### 1045 **23.1 Amendments**

1046  
1047 Amendments to this document should be noted below and the information at each site updated.  
1048 Amendment should be approved by the sponsor/coordinating investigator and approved by IEC as  
1049 appropriate. Amendments to Appendices should be recorded in the changed document.

### 1050 **23.2 Personnel Information**

1051  
1052 The Principal Investigator, at each site, is responsible that an investigator has sufficient knowledge  
1053 and is able to perform tasks related to and needed for the trial. This should be documented in the  
1054 site binder.

## 1055 **24 References**

- 1056
- 1057 1. Lawn JE, Davidge R, Paul VK, et al. Born too soon: care for the preterm baby. *Reprod Health*
- 1058           2013;**10 Suppl 1**:S5.
- 1059 2. Morley CJ, Davis PG, Doyle LW, et al. Nasal CPAP or intubation at birth for very preterm infants. *N*
- 1060           *Engl J Med* 2008;**358**(7):700-8.
- 1061 3. Soll RF, Pfister RH. Evidence-based delivery room care of the very low birth weight infant.
- 1062           *Neonatology* 2011;**99**(4):349-54.
- 1063 4. Sweet DG, Carnielli V, Greisen G, et al. European consensus guidelines on the management of
- 1064           neonatal respiratory distress syndrome in preterm infants--2013 update. *Neonatology*
- 1065           2013;**103**(4):353-68.
- 1066 5. Wyllie J, Perlman JM, Kattwinkel J, et al. Part 11: Neonatal resuscitation: 2010 International
- 1067           Consensus on Cardiopulmonary Resuscitation and Emergency Cardiovascular Care Science
- 1068           with Treatment Recommendations. *Resuscitation* 2010;**81 Suppl 1**:e260-87.
- 1069 6. Perlman J, Kattwinkel J, Wyllie J, et al. Neonatal resuscitation: in pursuit of evidence gaps in
- 1070           knowledge. *Resuscitation* 2012;**83**(5):545-50.
- 1071 7. Drevhammar T, Nilsson K, Zetterstrom H, et al. Comparison of seven infant continuous positive
- 1072           airway pressure systems using simulated neonatal breathing. *Pediatr Crit Care Med*
- 1073           2012;**13**(2):e113-9.
- 1074 8. Capasso L, Capasso A, Raimondi F, et al. A randomized trial comparing oxygen delivery on
- 1075           intermittent positive pressure with nasal cannulae versus facial mask in neonatal primary
- 1076           resuscitation. *Acta Paediatr* 2005;**94**(2):197-200.
- 1077 9. Delivery Room (DR) Ventilatory Support Via Bi-Nasal Prongs in Extremely Premature Infants
- 1078           (EPI) < 29 Weeks. Observational, Two Time Period Comparative Study of Prospectively
- 1079           Collected Data. The Pediatric Academic Societies (PAS) Annual Meeting; 2014; Vancouver.

1080

1081

1082 **25 Appendices**

1083 Clinical management protocol

1084 DMC instructions

1085 eCRF template and database variable list

1086 Financial grants application list

1087 **25.1 Schedule of Investigational Events**

1088

|                                    | <b>Screening of inpatients</b> | <b>Antenatal visit</b> | <b>Anticipated Delivery</b> | <b>Delivery 10-30 min</b> | <b>Follow-up after 72h</b> |
|------------------------------------|--------------------------------|------------------------|-----------------------------|---------------------------|----------------------------|
|                                    | Continually                    |                        |                             |                           |                            |
| Informed consent                   |                                | X                      |                             |                           |                            |
| Inclusion/exclusion criteria       |                                | X                      |                             |                           |                            |
| Randomisation                      |                                |                        | X                           |                           |                            |
| Initial respiratory support        |                                |                        |                             | X                         |                            |
| Clinical notes review <sup>A</sup> |                                |                        |                             |                           | X                          |
| Adverse events                     | Not applicable                 |                        |                             | Continually               |                            |
| Investigations                     | None planned                   |                        |                             |                           |                            |
| Blood samples                      | None planned                   |                        |                             |                           |                            |

1089

1090 **Table 1:** Schedule of Investigational events. Variables collected from records (A) are presented in  
 1091 Appendix: eCRF template and database variable list

1092

1093 **26 Amendments**

1094

1095 7 June 2016 1.0 EPN updated to 1.1

1096 Start date inserted

1097 Clinical trials registration number inserted

1098 Stavanger and Linköping added as sites

1099 DMC members confirmed

1100 Clinicaltrials.gov registration number added

1101 5 October 2017 1.2

1102 Trial abbreviation changed from CORSAD28 to CORSAD

1103 Vilnius and Poznan added as sites

1104 PI addresses and titles updated

1105 CE-mark status on new resuscitation device (rPAP) corrected

1106 Caffein added as variable in eCRF (no change in CIP)

1107 Endorsment page reviewed and corrected

1108 22 November 2017 1.3

1109 PI at Karolinska Hospital updated

1110 5 December 2017 1.4

1111 Iceland University Hospital added as site

1112 Study coordinator split into management and administration

1113 28 February 2018 1.5

1114 Sahlgrenska University Hospital, Gothenburg added as site

1115 28 February 2018 1.6

1116 Expected completion date adjusted to Q4 2019

---

1117                    Lars Söderström and Helena Fenger-Krog has retired. No immediate need for  
1118                    contracting a new biostatistician or GCP consultant.
