# Supplementary material
Source: PubMed Central journal article supplement (PMC8424478)
Supplement: jamapediatr-e211497-s005.pdf [file jamapediatr-e211497-s005.pdf]

# Data Sharing Statement

Donaldsson. Comparison of Respiratory Support After Delivery in Infants Born Before 28 Weeks' Gestational Age. *JAMA Pediatr*. Published June 14, 2021. doi:10.1001/jamapediatrics.2021.1497

## Data

**Data available:** Yes

**Data types:** Deidentified participant data

**How to access data:** By email to [snorri.donaldsson@sll.se](mailto:snorri.donaldsson@sll.se), [thomas.drevhammar@gmail.com](mailto:thomas.drevhammar@gmail.com), or [baldvin.jonsson@sll.se](mailto:baldvin.jonsson@sll.se)

**When available:** Beginning date: 05-20-2022

## Supporting Documents

**Document types:** None

## Additional Information

**Who can access the data:** Researchers whose proposed use of the data has been approved

**Types of analyses:** For a specified purpose

**Mechanisms of data availability:** Access to CORSAD data requires an association with the study and agreement to abide by study policies and procedures. Nonparticipating site investigators may request ancillary analyses, but a CORSAD investigator must be directly involved as co-investigator. Data access is provided to Investigators, Collaborators, or Ancillary Study Investigators for research on completion of the following procedure: A paper proposal must be approved for each paper, prior to request for data. It should describe the research question, main goals, and initial analytical approach. The proposal is reviewed by the Steering Committee for consistency with the goals of the CORSAD study, lack of overlap with other work, and scientific integrity. All persons who will have access to study data need to be named on the proposal. If there is a change of analyst (someone new who will access the data), the name of the new analyst needs to be communicated to the Steering Committee coordinator for study records. Proposals can be emailed to Thomas Drevhammar or Snorri Donaldsson. Seeking investigators must fund needed transfers.
